# Supplementary material for: A novel Ce–Sb binary oxide catalyst for the selective catalytic reduction of NOx with NH3
Source: Royal Society of Chemistry journal article supplement (doi:10.1039/c6cy01756h), 2016-01-01
Supplement: c6cy01756h1.pdf [file c6cy01756h1.pdf]

Supporting information

**A novel Ce-Sb binary oxide catalyst for the selective catalytic  
reduction of NO<sub>x</sub> with NH<sub>3</sub>**

Zhiming Liu<sup>a\*</sup>, Haiyan Liu<sup>a</sup>, Hui Zeng<sup>a</sup>, Qi Xu<sup>b\*</sup>

<sup>a</sup> State Key Laboratory of Chemical Resource Engineering, Beijing University of  
Chemical Technology, Beijing 100029, China

<sup>b</sup> Jiangsu Collaborative Innovation Center for Ecological Building Materials and  
Environmental Protection Equipments, Key Laboratory for Advanced Technology in  
Environmental Protection of Jiangsu Province, Yancheng Institute of Technology,  
Yancheng 224051, China

---

\* Corresponding author. Tel: +86-10-64427356;  
E-mail: [liuzm@mail.buct.edu.cn](mailto:liuzm@mail.buct.edu.cn) (Z. Liu); [ycxqsteve@163.com](mailto:ycxqsteve@163.com) (Q. Xu)

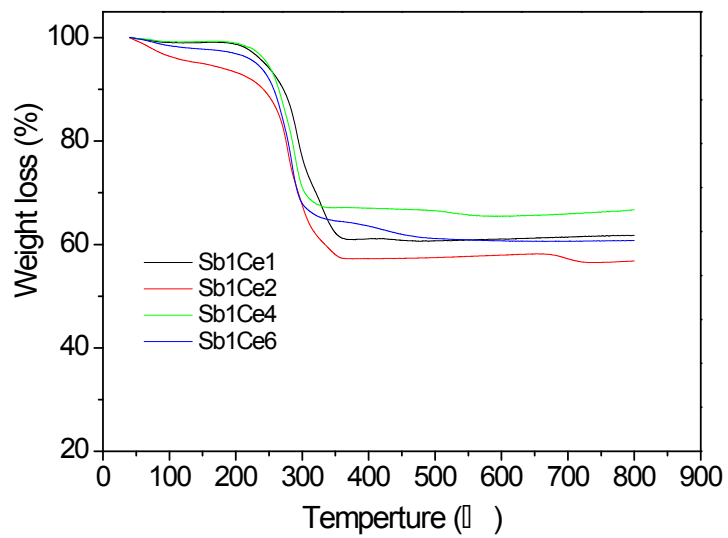

Figure S1. Thermogravimetric analysis of Sb1Cex catalysts.
